# Supplementary material for: Electron transfer within β-diketiminato nickel bromide and cobaltocene redox couples activating CO2
Source: Royal Society of Chemistry journal article supplement (doi:10.1039/d0cc06983c), 2020-12-16
Supplement: d0cc06983c1.pdf [file d0cc06983c1.pdf]

**Supporting Information for:**

**Electron transfer within  $\beta$ -diketiminato nickel bromide and  
cobaltocene redox couples activating CO<sub>2</sub>**

Philipp Zimmermann, Alexander F. R. Kilpatrick, Deniz Ar, Serhiy Demeshko, Beatrice Cula, Christian  
Limberg\*

**Table of Contents**

|                                    |     |
|------------------------------------|-----|
| Experimental Section               | S2  |
| Electrochemistry                   | S5  |
| IR spectra                         | S8  |
| EPR spectra                        | S11 |
| SQUID                              | S14 |
| X-Ray crystallographic information | S15 |
| References                         | S16 |

## Experimental Section

**General Considerations.** All manipulations were carried out under an argon atmosphere using Schlenk techniques or in glove boxes under either dinitrogen or argon atmospheres maintained below 1 ppm of O<sub>2</sub> and H<sub>2</sub>O. Glassware was heated under vacuum for approx. 10 min using a heat gun at 650 °C prior to use. Solvents were used purified from an MBraun solvent purification system (SPS). C<sub>6</sub>D<sub>6</sub> was stored in a glove box and purified by 3 Å molecular sieves. IR spectra were recorded on a Bruker ALPHA spectrometer with an ATR sampling unit. EPR samples were recorded at a Bruker ESR 300 X-Band EPR or a X-band Bruker EMXplus spectroscope equipped with a recirculating Helium-cooling system ColdEdge-ER4112HV-CF10-H. Elemental analyses were performed with a HEKA Euro 3000 elemental analyzer. The magnetic data of the microcrystalline sample of **2** were recorded on a SQUID magnetometer (SQUID-VSM or MPMS3, Quantum Design) under an external magnetic field (0.5 T) in the temperature range of 2–300 K.

L<sup>tBu</sup>NiBr<sup>[1]</sup> was prepared according to the literature procedure. Cp<sup>\*</sup><sub>2</sub>Co and Cp<sub>2</sub>Co were purchased from Sigma Aldrich.

### Synthesis of [L<sup>tBu</sup>NiBr][CoCp<sup>\*</sup><sub>2</sub>], **1**.

To a solution of L<sup>tBu</sup>NiBr (82.3 mg, 0.13 mmol) in 2.5 mL toluene a solution of CoCp<sup>\*</sup><sub>2</sub> (42.3 mg, 0.13 mmol, 1 eq.) in 2 mL toluene was added and the resulting brown solution shaken for one minute. After standing for 1 h the supernatant was filtered off and the resulting crystalline residue washed with hexane. After evaporation of all volatiles **1** was isolated as a bronze coloured crystalline solid (97.0 mg, 0.10 mmol) in 78 % yield.

ATR-IR (solid):  $\nu$  = 2954, 2897, 2860, 2076, 1584, 1498, 1441, 1408, 1362, 1321, 1253, 1219, 1195, 1150, 1095, 1056, 1022, 963, 936, 879, 845, 799, 774, 764, 754, 700, 590, 532, 443 cm<sup>-1</sup>.

Elemental analysis calc. (%) for C<sub>55</sub>H<sub>83</sub>BrCoN<sub>2</sub>Ni (969.79 g·mol<sup>-1</sup>): C 68.12, H 8.63, N 2.89; found: C 67.36, H 8.44, N 2.91.

Crystals suitable for X-ray diffraction analysis were grown from a toluene solution at -30 °C.

### Synthesis of [L<sup>tBu</sup>NiBr][Cp<sub>2</sub>Co], **2**.

A solution of CoCp<sub>2</sub> (28.9 mg, 0.15 mmol, 1 eq.) in toluene (1 mL) was added to a solution of L<sup>tBu</sup>NiBr (98.0 mg, 0.15 mmol) in toluene (2 mL) and the resulting red solution stirred for one minute. Subsequently, it was stored at room temperature. Within 3 hours a red crystalline precipitate formed, from which the supernatant was filtered off. The solid was washed with 0.2 mL of toluene, and after evaporation of all volatiles, **2** was isolated as a red brown solid (77.0 mg). After storing the mother liquor at -30 °C for 2 days, another crop of red crystalline solid could be obtained. Filtering off the supernatant and evaporation of all solvent gave another portion of **2** (38.9 mg; total yield: 115.9 mg, 91 %).

ATR-IR (solid):  $\nu$  = 3097, 3040, 3010, 2955, 2901, 2863, 1582, 1524, 1498, 1461, 1444, 1407, 1362, 1322, 1279, 1252, 1218, 1196, 1151, 1095, 1057, 1029, 1002, 962, 935, 888, 860, 801, 775, 768, 756, 731, 696, 684, 647, 505, 465, 435, 407 cm<sup>-1</sup>.

Elemental analysis calc. (%) for  $C_{45}H_{63}BrCoN_2Ni$  ( $829.53\text{ g}\cdot\text{mol}^{-1}$ ): C 65.16, H 7.66, N 3.38; found: C 65.62, H 7.75, N 3.40.

Crystals suitable for X-ray diffraction analysis were grown from a  $Et_2O$  solution at  $-30\text{ }^{\circ}C$ .

#### Colour changes observed for **2** upon variation of the temperature

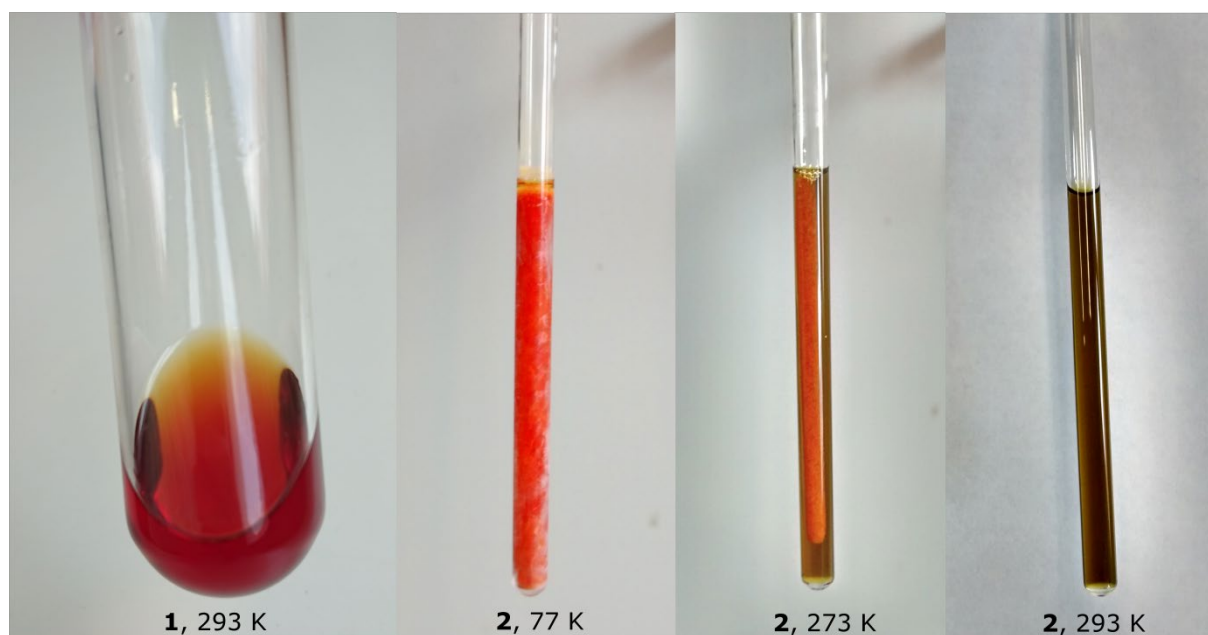

**Figure S1.** Colour of solution of **1** in toluene at ambient temperature and colour changes observed for solutions of **2** in  $C_6D_6$  upon freezing/thawing.

#### Reaction of **1** with $CO_2$ , generation of $[L^{tBu}NiCO_3][CoCp^*_2]$ .

A solution of **1** (0.5 mg, 0.001 mmol) in  $C_6D_6$  in an NMR tube sealed with a J. Young valve was degassed and the atmosphere exchanged with  $CO_2$  gas. After shaking for 1 minute, the solution became cloudy. The resulting suspension was analysed by means of ATR-IR spectroscopy.

ATR-IR (solid):  $\nu = 3060, 2960, 2926, 2868, 1710, 1620, 1518, 1461, 1433, 1408, 1366, 1320, 1259, 1220, 1181, 1093, 1015, 935, 865, 794, 763, 700, 636, 449\text{ cm}^{-1}$ .

#### Reaction of **1** with $^{13}CO_2$ , generation of $[L^{tBu}Ni(^{13}C)O_3][CoCp^*_2]$ .

A solution of **1** (0.5 mg, 0.001 mmol) in  $C_6D_6$  in an NMR tube sealed with a J. Young valve was degassed and the atmosphere exchanged with  $^{13}CO_2$  gas. After shaking for 1 minute the solution became cloudy. The resulting suspension was analysed by means of ATR-IR spectroscopy.

ATR-IR (solid):  $\nu = 3312, 3060, 2959, 2920, 2852, 1633, 1619, 1588, 1536, 1516, 1459, 1428, 1408, 1383, 1365, 1321, 1260, 1220, 1179, 1163, 1096, 1017, 935, 865, 795, 762, 721, 685, 638, 585, 505, 449\text{ cm}^{-1}$ .

### Synthesis of $[L^{tBu}NiCO_3][CoCp_2]$ , **3**.

A solution of **2** (51.0 mg, 0.06 mmol) in toluene (6 mL) was degassed and the atmosphere was exchanged by  $CO_2$ . After standing for one week, the supernatant was filtered off and the crystalline residue dried under vacuum. After washing with  $Et_2O$  and evaporation of all volatiles, **3** was isolated as a brown solid (6.1 mg, 0.01 mmol, 25 % absolute yield, 50 % relative yield).

ATR-IR (solid):  $\nu = 3062, 2960, 2927, 2868, 1710, 1619, 1588, 1564, 1534, 1518, 1461, 1431, 1408, 1382, 1362, 1323, 1259, 1219, 1178, 1103, 1058, 1043, 1018, 984, 957, 934, 862, 795, 761, 726, 684, 637, 583, 555, 518, 497, 463\text{ cm}^{-1}$ .

Elemental analysis calc. (%) for  $C_{46}H_{63}CoN_2NiO_3$  (809.63  $g \cdot mol^{-1}$ ): C 68.24, H 7.84, N 3.46; found: C 66.67, H 8.56, N 3.88. Crystals suitable for X-ray diffraction analysis were grown from a  $C_6D_6$  solution.

### Reaction of **2** with $^{13}CO_2$ , generation of $[L^{tBu}Ni(^{13}C)O_3][CoCp_2]$ .

A solution of **2** (12.3 mg, 0.015 mmol) in  $C_6D_6$  in an NMR tube sealed with a J. Young valve was degassed and the atmosphere exchanged with  $CO_2$  gas. After 30 minutes the solution became cloudy and after 24 h a microcrystalline solid had precipitated. The resulting suspension was analysed by means of ATR-IR.

ATR-IR (solid):  $\nu = 3063, 2961, 2868, 1618, 1587, 1578, 1518, 1462, 1430, 1411, 1393, 1382, 1363, 1322, 1260, 1229, 1178, 1161, 1105, 1058, 1043, 1012, 934, 861, 805, 794, 761, 727, 684, 637, 497, 465, 433, 408\text{ cm}^{-1}$ .

## Electrochemistry

Electrochemical studies were carried out using a PalmSens EmStat Blue potentiostat under computer control. Cyclic voltammetry experiments were performed under argon using a three-electrode configuration with a glassy carbon disc (7.0 mm<sup>2</sup>) as the working electrode, a Pt wire as the counter electrode and a Ag wire as the pseudo-reference electrode. Sample solutions were prepared by dissolving the analyte (*ca.* 5 mM) in THF (3.0 cm<sup>3</sup>) followed by addition of a supporting electrolyte [<sup>n</sup>Bu<sub>4</sub>N][PF<sub>6</sub>]. The reported mid-peak potentials are referenced internally to that of the FeCp<sub>2</sub><sup>+/0</sup> redox couple, which was measured by adding ferrocene (*ca.* 0.5 mg) to the sample solution.

**Cyclic Voltammograms recorded in addition to those displayed in Figure 4**

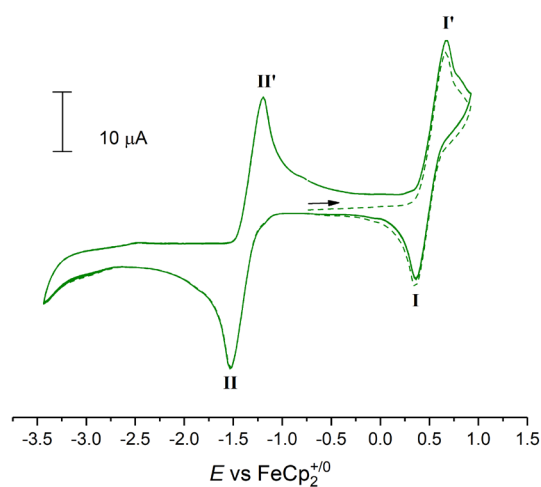

**Figure S2.** CV scans (4 cycles) of <sup>t</sup>BuLNiBr in THF/0.1 M [<sup>n</sup>Bu<sub>4</sub>N][PF<sub>6</sub>], scan rate 100 mV s<sup>-1</sup>. Dotted line denotes first scan.

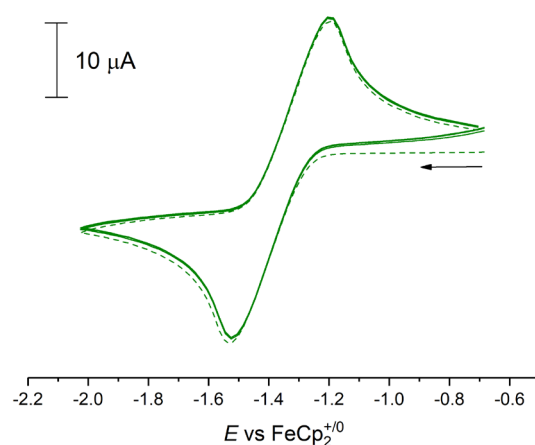

**Figure S3.** CV scans (4 cycles) of <sup>t</sup>BuLNiBr in THF/0.1 M [<sup>n</sup>Bu<sub>4</sub>N][PF<sub>6</sub>], scan rate 100 mV s<sup>-1</sup>. Dotted line denotes first scan.

**Table S1.** CV peak potentials ( $E_p$  vs  $\text{FeCp}_2^{+/0}$ ) and limiting currents ( $i_p$ ) for  ${}^t\text{BuLNiBr}$  in THF / 0.1 M  $[\text{nBu}_4\text{N}][\text{PF}_6]$  at scan rate  $100 \text{ mV s}^{-1}$ .

|                   | $E_{pa} / \text{V}$ | $E_{pc} / \text{V}$ | $E_{1/2} / \text{V}$ | $\Delta E_{pp} / \text{mV}$ | $i_{pa} / \mu\text{A}$ | $i_{pc} / \mu\text{A}$ | $ i_{pa}/i_{pc} $ |
|-------------------|---------------------|---------------------|----------------------|-----------------------------|------------------------|------------------------|-------------------|
| <b>Process I</b>  | 0.665               | 0.365               | 0.515                | 300                         | 25.485                 | -17.720                | 1.44              |
| <b>Process II</b> | -1.195              | -1.535              | -1.365               | 340                         | 24.710                 | -25.369                | 0.97              |

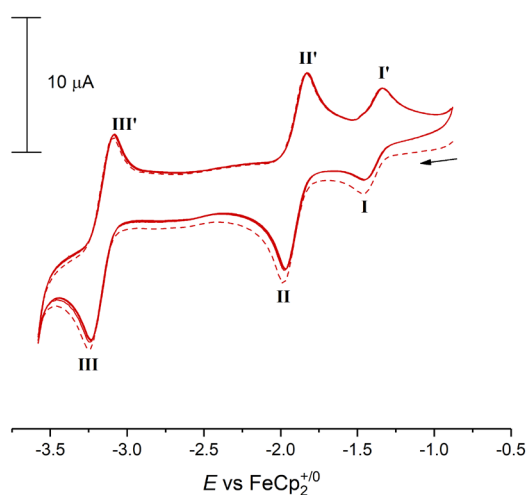

**Figure S4.** CV scans (4 cycles) of  $[\text{}^t\text{BuLNiBr}][\text{CoCp}^*_2]$  in THF/0.1 M  $[\text{nBu}_4\text{N}][\text{PF}_6]$ , scan rate  $100 \text{ mV s}^{-1}$ . Dotted line denotes first scan.

**Table S2.** CV peak potentials ( $E_p$  vs  $\text{FeCp}_2^{+/0}$ ) and limiting currents ( $i_p$ ) for  $[\text{}^t\text{BuLNiBr}][\text{CoCp}^*_2]$  in THF / 0.1 M  $[\text{nBu}_4\text{N}][\text{PF}_6]$  at scan rate  $100 \text{ mV s}^{-1}$ .

|                    | $E_{pa} / \text{V}$ | $E_{pc} / \text{V}$ | $E_{1/2} / \text{V}$ | $\Delta E_{pp} / \text{mV}$ | $i_{pa} / \mu\text{A}$ | $i_{pc} / \mu\text{A}$ | $ i_{pa}/i_{pc} $ |
|--------------------|---------------------|---------------------|----------------------|-----------------------------|------------------------|------------------------|-------------------|
| <b>Process I</b>   | -1.34               | -1.98               | -1.66                | 0.64                        | 2.365                  | -2.117                 | 1.12              |
| <b>Process II</b>  | -1.82               | -1.97               | -1.90                | 0.15                        | 6.509                  | -7.202                 | 0.90              |
| <b>Process III</b> | -3.23               | -3.08               | -3.155               | -0.15                       | 7.141                  | -8.784                 | 0.81              |

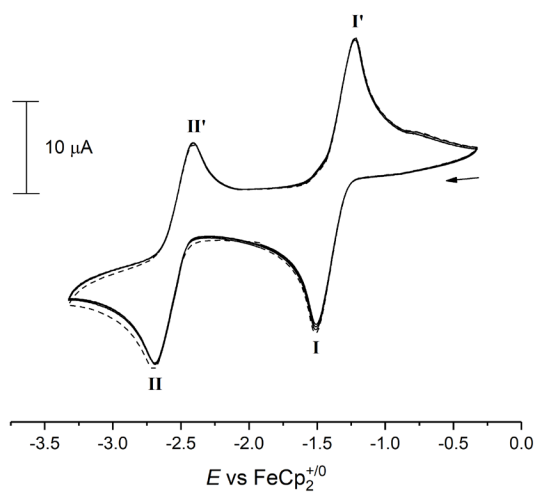

**Figure S5.** CV scans (4 cycles) of  $[\text{tBuLNiBr}][\text{CoCp}_2]$  in THF/0.1 M  $[\text{nBu}_4\text{N}][\text{PF}_6]$ , scan rate  $100 \text{ mV s}^{-1}$ . Dotted line denotes first scan.

**Table S3.** CV peak potentials ( $E_p$  vs  $\text{FeCp}_2^{+/0}$ ) and limiting currents ( $i_p$ ) for  $[\text{tBuLNiBr}][\text{CoCp}_2]$  in THF / 0.1 M  $[\text{nBu}_4\text{N}][\text{PF}_6]$  at scan rate  $100 \text{ mV s}^{-1}$ .

|                   | $E_{pa} / \text{V}$ | $E_{pc} / \text{V}$ | $E_{1/2} / \text{V}$ | $\Delta E_{pp} / \text{mV}$ | $i_{pa} / \mu\text{A}$ | $i_{pc} / \mu\text{A}$ | $ i_{pa}/i_{pc} $ |
|-------------------|---------------------|---------------------|----------------------|-----------------------------|------------------------|------------------------|-------------------|
| <b>Process I</b>  | -1.225              | -1.505              | -1.365               | 0.28                        | 14.20                  | -15.32                 | 0.93              |
| <b>Process II</b> | -2.415              | -2.685              | -2.55                | 0.27                        | 11.61                  | -13.1                  | 0.89              |

## IR spectra

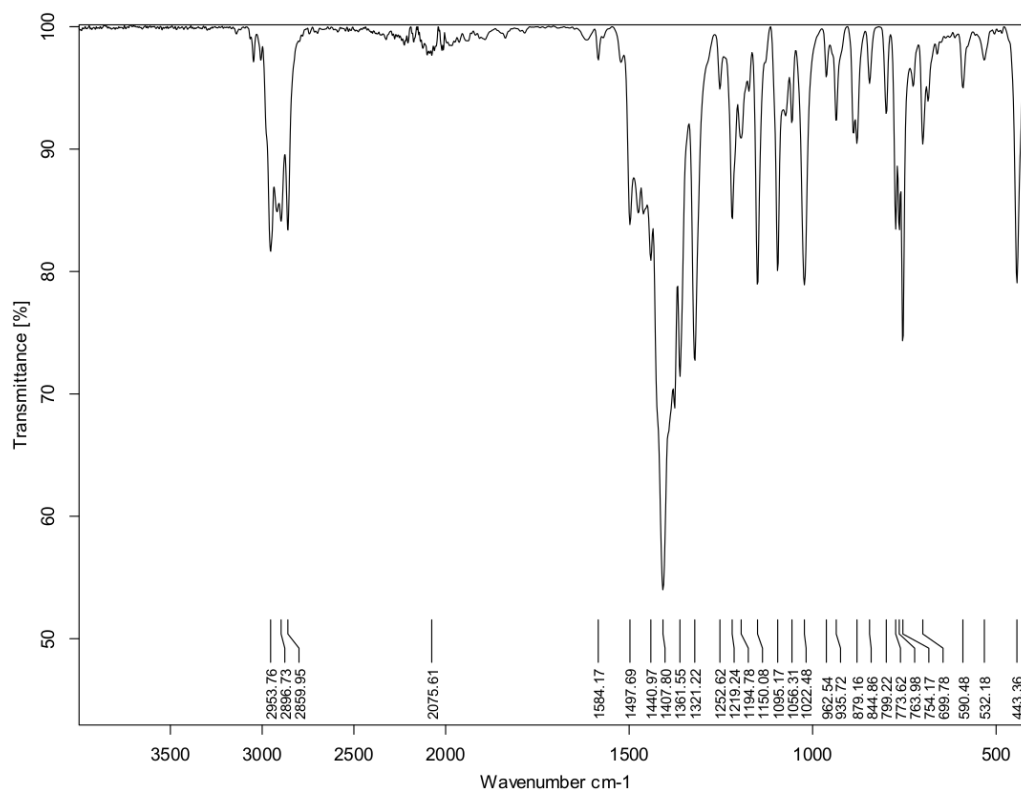

**Figure S6.** ATR-IR spectrum of (solid) **1**.

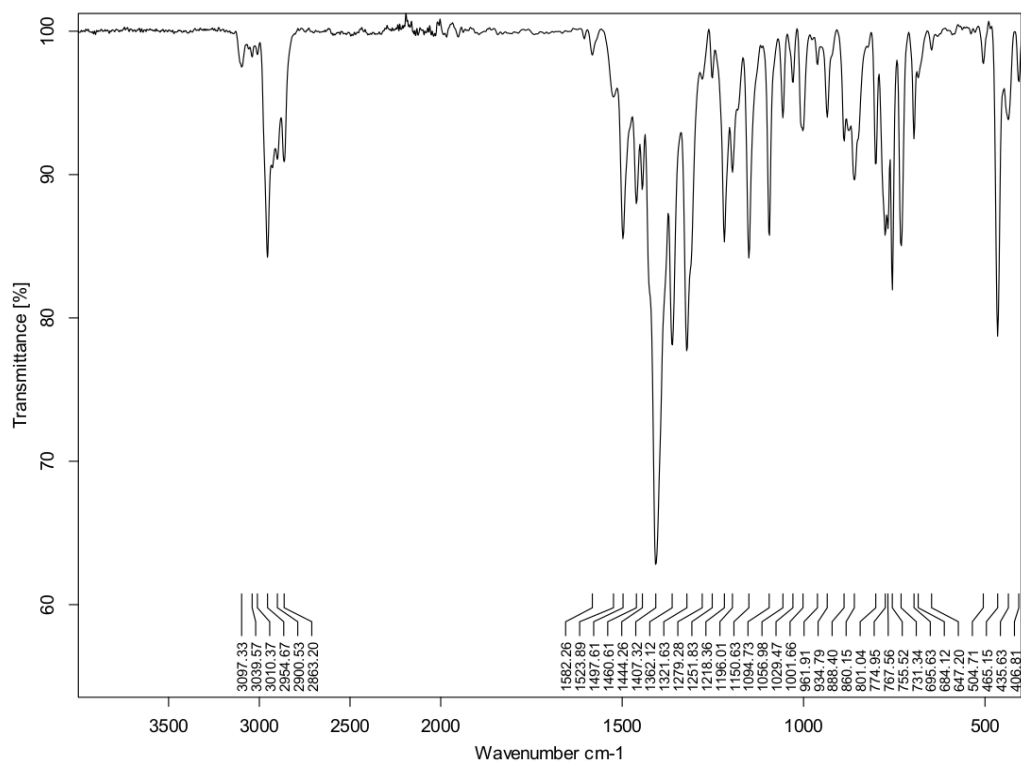

**Figure S7.** ATR-IR spectrum of (solid) **2**.



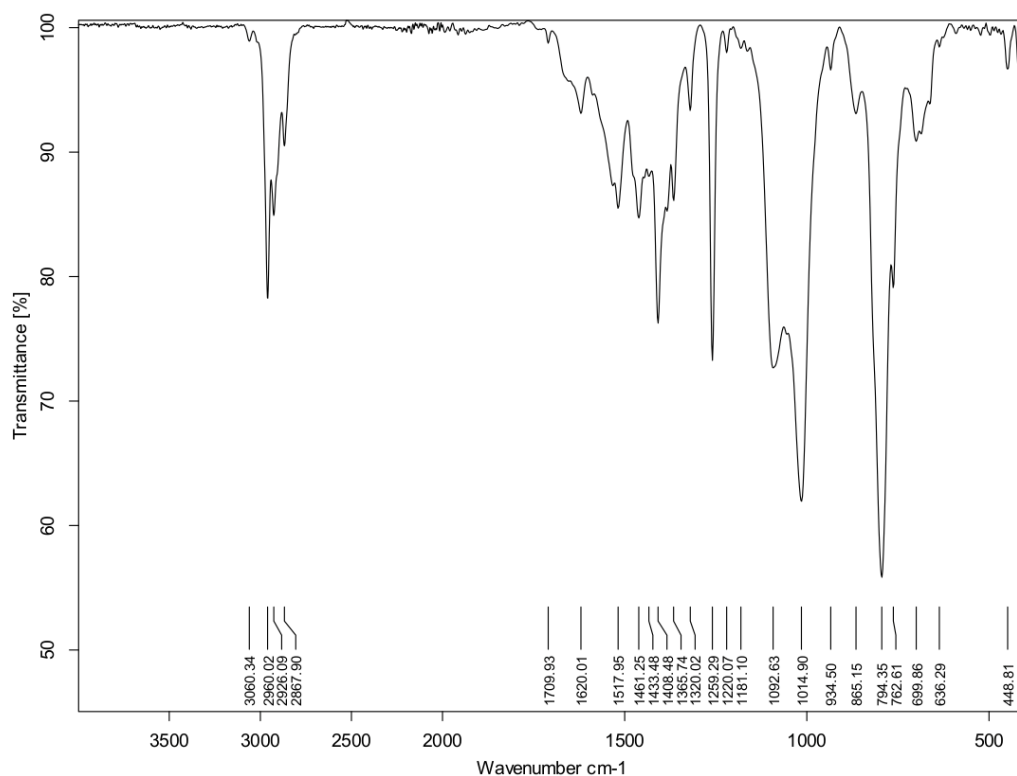

**Figure S8.** ATR-IR spectrum of the (solid) reaction mixture obtained after the reaction of **1** with CO<sub>2</sub> and evaporation of all volatiles.

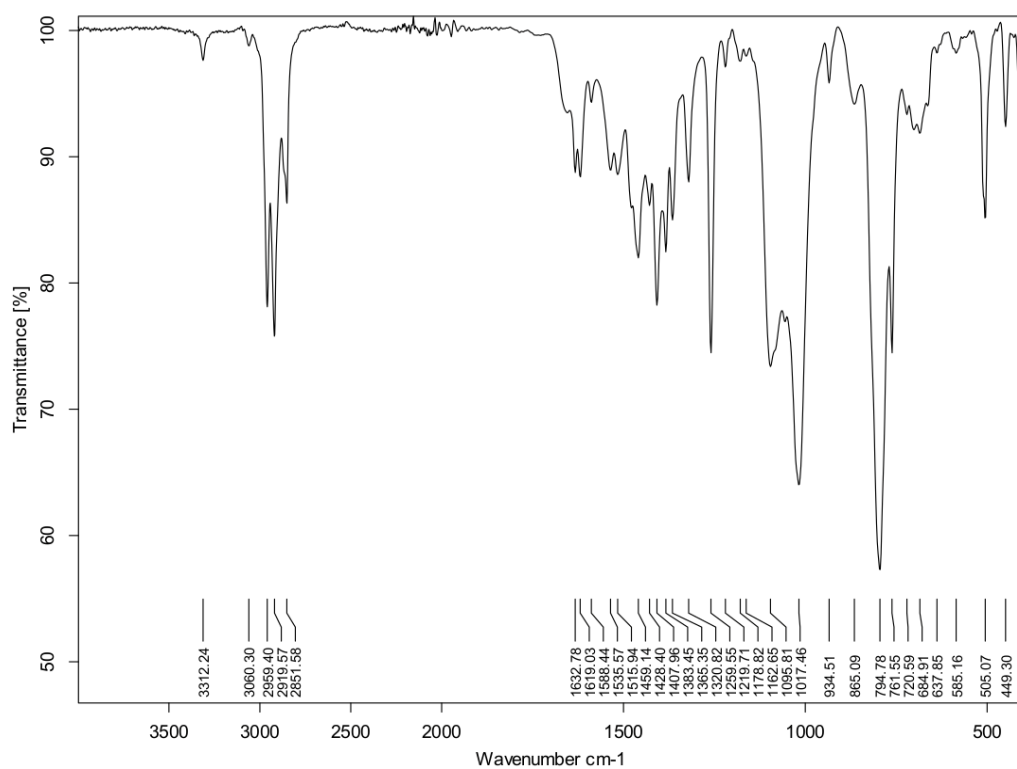

**Figure S9.** ATR-IR spectrum of the (solid) reaction mixture obtained after the reaction of **1** with <sup>13</sup>CO<sub>2</sub> and evaporation of all volatiles.

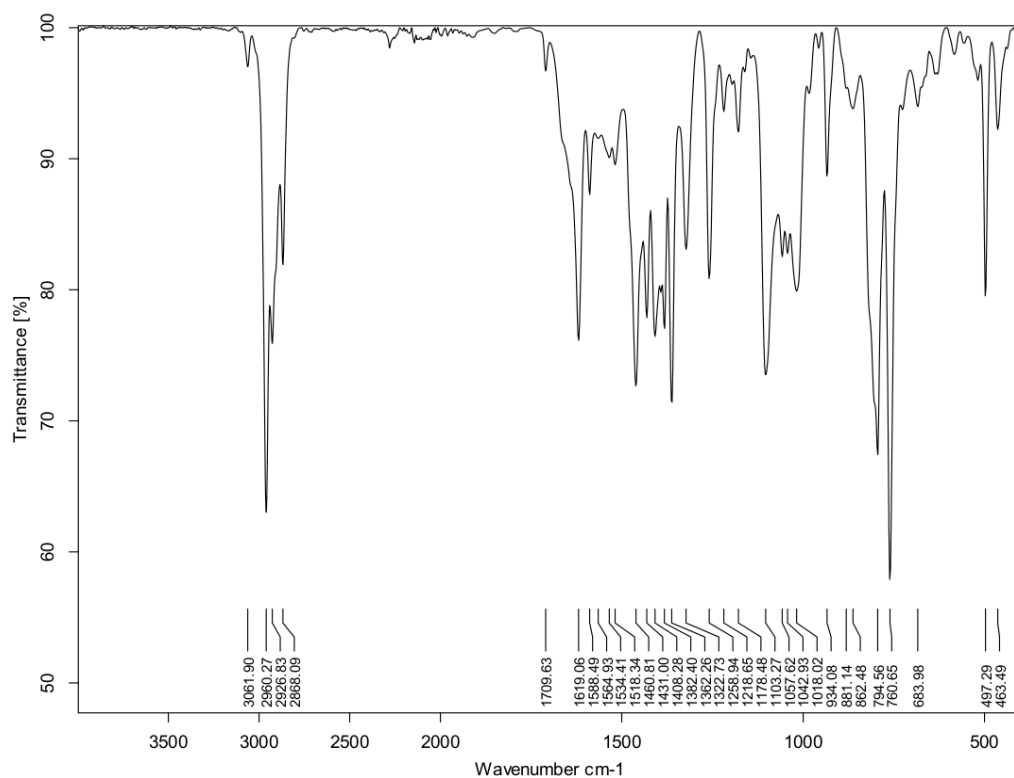

**Figure S10.** ATR-IR spectrum of (solid) **3**.

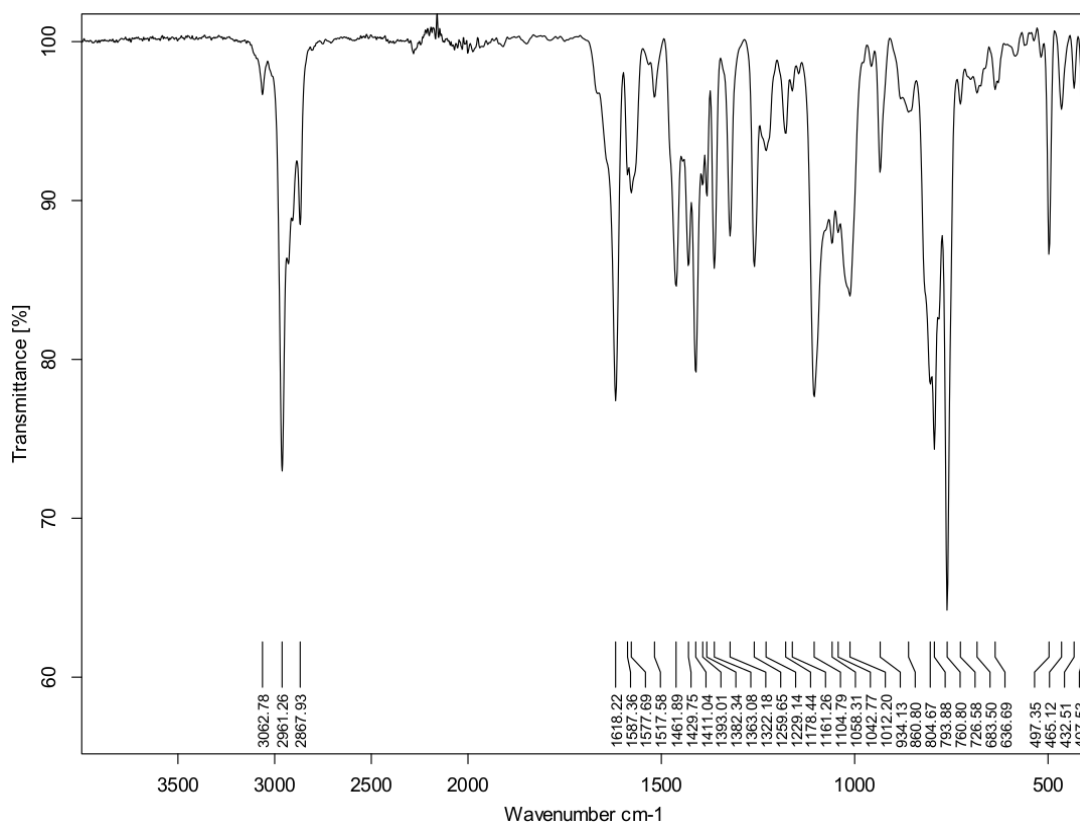

**Figure S11.** ATR-IR spectrum of the (solid) reaction mixture obtained after the reaction of **2** with <sup>13</sup>CO<sub>2</sub> and evaporation of all volatiles.

## EPR spectra

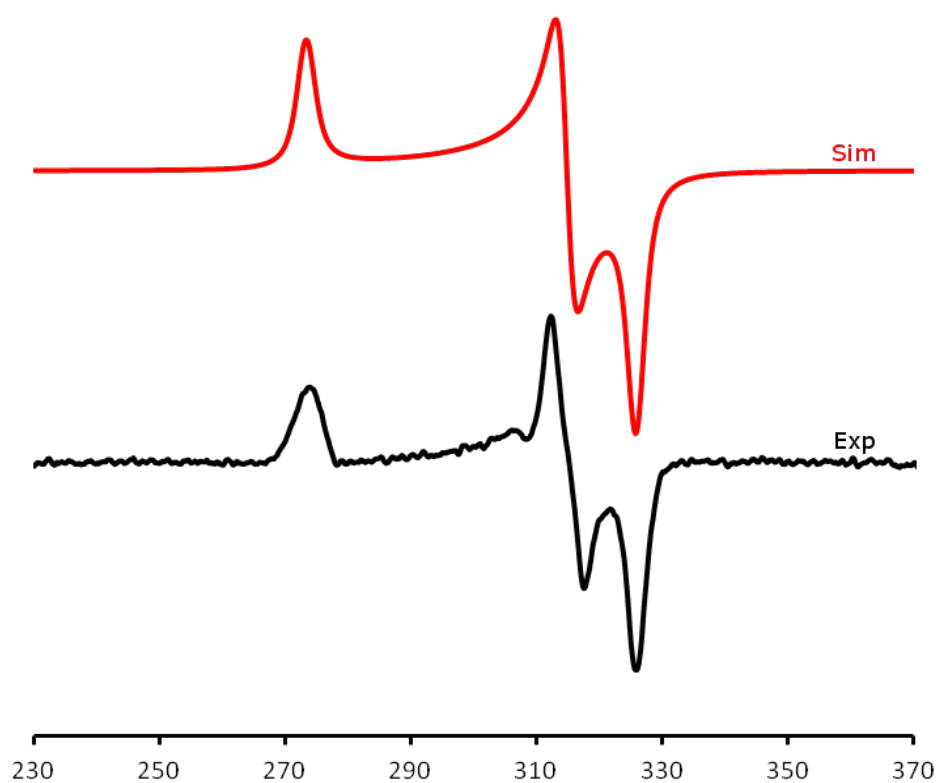

**Figure S12.** X-band EPR spectrum of a solid sample of **1** (black) at 77 K and powder simulation (red) with  $g_1 = 2.469$ ,  $g_2 = 2.144$ , and  $g_3 = 2.071$ .

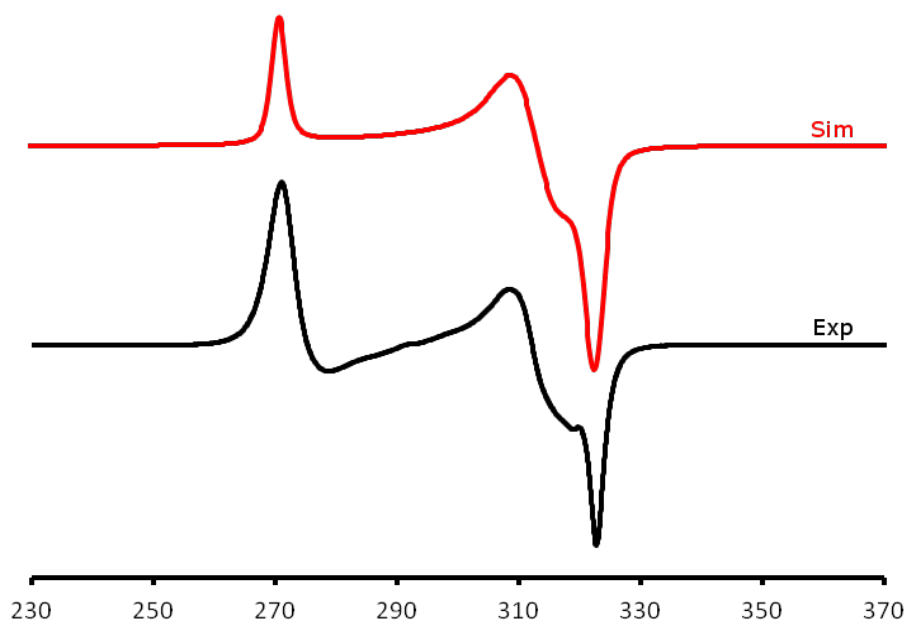

**Figure S13.** X-band EPR spectrum of a solid sample of **2** (black) at 13 K and powder simulation (red) with  $g_1 = 2.466$ ,  $g_2 = 2.136$ , and  $g_3 = 2.072$ .

Calculation of thermodynamic data for the dissociation of **2** from variable temperature EPR spectroscopy, quantified utilizing a TEMPOL (4-Hydroxy-TEMPO) (1.0 mmol·L<sup>-1</sup> in toluene) standard.

Dissociation of **2** to L<sup>tBu</sup>NiBr and Cp<sub>2</sub>Co:

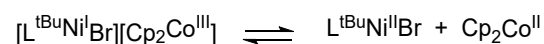

$$K = \frac{c(\text{Ni}^{\text{II}})^2}{c(\text{Ni}^{\text{I}})}$$

$$c_0(\text{Ni}^{\text{I}}) = 1.324 \text{ mmol} \cdot \text{L}^{-1}$$

$$c(\text{Ni}^{\text{II}}) = c_0(\text{Ni}^{\text{I}}) - c(\text{Ni}^{\text{I}})$$

$$c(\text{Ni}^{\text{I}}) = c_0(\text{Ni}^{\text{I}}) \cdot \frac{\text{Yield}(\text{Ni}^{\text{I}})}{100}$$

**Table S1.** Determination of the equilibrium constants (K) for dissociation of **2** at different temperatures.

| T / K | T <sup>-1</sup> / K <sup>-1</sup> | Yield Ni <sup>I</sup><br>EPR Signal<br>in % | c(Ni <sup>I</sup> ) /<br>mmol·L <sup>-1</sup> | c(Ni <sup>II</sup> ) /<br>mmol·L <sup>-1</sup> | K         | ln K       |
|-------|-----------------------------------|---------------------------------------------|-----------------------------------------------|------------------------------------------------|-----------|------------|
| 293   |                                   | 0                                           |                                               |                                                |           |            |
| 273   | 0.003663                          | 4.15                                        | 0.054946                                      | 1.269054                                       | 0.0341174 | − 3.377948 |
| 253   | 0.003952                          | 7.70                                        | 0.101948                                      | 1.222052                                       | 0.0682652 | − 2.684355 |
| 233   | 0.004292                          | 17.77                                       | 0.235274                                      | 1.088725                                       | 0.1984901 | − 1.617016 |
| 183   | 0.005464                          | 59.88                                       | 0.792811                                      | 0.531188                                       | 2.8097776 | 1.033105   |

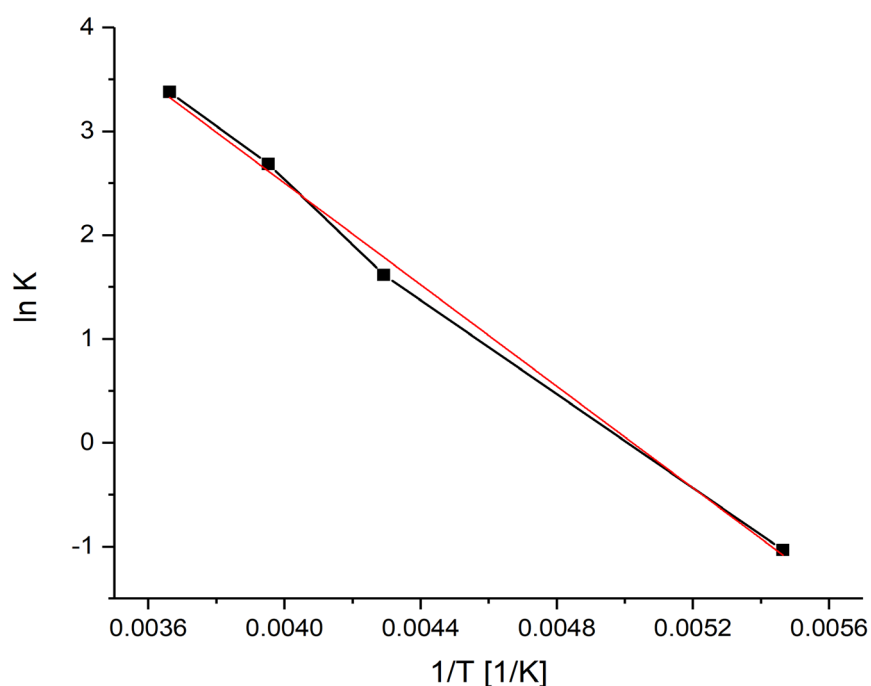

**Figure S14.** Van't Hoff plot ( $R^2 = 0.9966$ ) of  $\ln K$  vs.  $T^{-1}$  for determination of thermodynamic data for the dissociation of **2**.

$$\ln K_{eq} = \Delta H \frac{1}{RT} + \Delta S \frac{1}{R} \quad \text{Van't Hoff plot}$$

$$\Delta H = \text{Slope} \cdot R$$

$$\Delta S = \text{Intercept} \cdot R$$

**Table S2.** Considerations for determination of thermodynamic data for dissociation of **2** from the Van't Hoff plot.

|                                      | STD      |        |
|--------------------------------------|----------|--------|
| Slope                                | 2446     | 101.4  |
| Intercept                            | − 12.28  | 0.4458 |
| Gas constant R / J·mol <sup>−1</sup> | 8.314551 |        |

**Table S3.** Thermodynamic data for dissociation of **2**, obtained from the Van't Hoff plot.

|     | H / kJ·mol <sup>−1</sup> | S / J·mol <sup>−1</sup> |
|-----|--------------------------|-------------------------|
|     | − 20.33739175            | − 102.10269             |
| STD | 0.843095471              | 3.70662684              |

## SQUID magnetometry

Temperature-dependent magnetic susceptibility measurements were carried out with a *Quantum-Design* MPMS3 SQUID magnetometer equipped with a 7 Tesla magnet in the range from 295 to 2.0 K at a magnetic field of 0.5 T. The powdered sample was contained in a polycarbonate capsule and fixed in a non-magnetic sample holder. Each raw data file for the measured magnetic moment was corrected for the diamagnetic contribution of the sample holder and the polycarbonate capsule. The molar susceptibility data were corrected for the diamagnetic contribution.

Simulation of the experimental magnetic data was performed with the *julX* program: E. Bill, Max-Planck Institute for Chemical Energy Conversion, Mülheim/Ruhr, Germany.

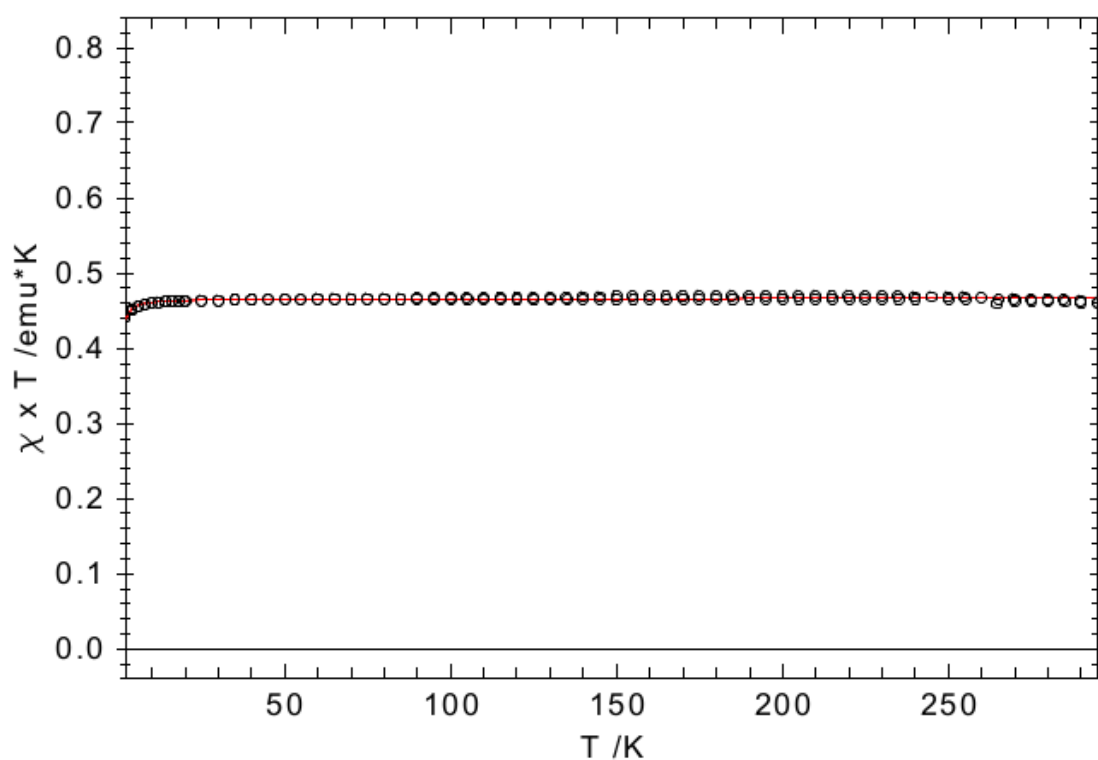

**Figure S15.** Plot (open circles) of  $\chi_M \times T$  against  $T$  for solid **2**. The red curve represents the best fit with parameters  $g = 2.23$  (for  $S = \frac{1}{2}$ ),  $TIP = 650 \times 10^{-6} \text{ cm}^3 \text{ mol}^{-1}$  and  $\theta$  (Weiss temperature) =  $-0.1 \text{ K}$ .

## X-Ray crystallographic information

The data collections were performed with a BRUKER D8 VENTURE area detector with Mo-K $\alpha$  radiation ( $\lambda$  = 0.71073 Å). Multi-scan absorption corrections implemented in SADABS<sup>[2]</sup> were applied to the data. The structures were solved by intrinsic phasing method<sup>[3]</sup> and refined by full matrix least square procedures based on  $F^2$  with all measured reflections<sup>[4]</sup> with anisotropic temperature factors for all non-hydrogen atoms. All hydrogen atoms were added geometrically and refined by using a riding model. Squeeze<sup>[5]</sup> refinement have been applied to the data of complex **2**.

CCDC numbers 2023971 (complex **1x3tol**), 2024643 (complex **2**) and 2023970 (complex **4**) contain the supplementary crystallographic data for this paper. These data can be obtained free of charge from The Cambridge Crystallographic Data Centre via [www.ccdc.cam.ac.uk/data\\_request/cif](http://www.ccdc.cam.ac.uk/data_request/cif).

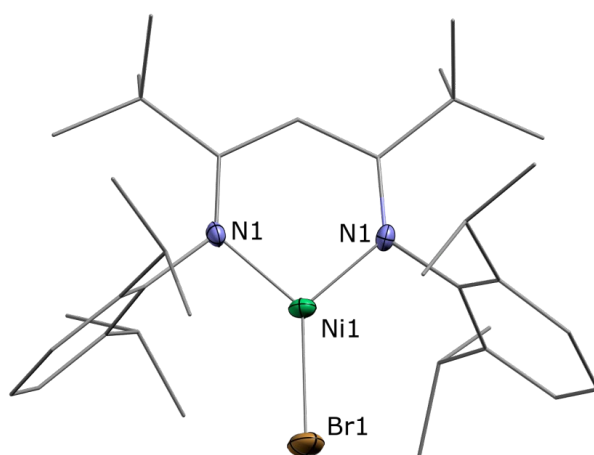

**Figure S16.** Molecular structure of  $L^{tBu}NiBr$ . Hydrogen atoms are omitted for clarity. Selected bond lengths /Å and angles /°: N1-Ni1 1.8112(16), Ni1-Br1 2.2781(5); N1-Ni1-Br1 131.81(13).

## References

- [1] S. Pfirrmann, C. Limberg, C. Herwig, R. Stößer, B. Ziemer, *Angew. Chem. Int. Ed.* **2009**, *48*, 3357-3361.
- [2] G. M. Sheldrick, *SADABS* **1996**, University of Göttingen, Germany.
- [3] G. M. Sheldrick, *Acta Crystallogr. A* **2015**, *71*, 3.
- [4] G. M. Sheldrick, *Acta Crystallogr. C* **2015**, *71*, 3.
- [5] A. L. Spek, *Acta Crystallogr. D, Biological crystallography* **2009**, *65*, 148.
